1  
2  
3  
4  
5  
6  
7  
8  
9  
10  
11  
12  
13  
14  
15  
16  
17  
18  
19  
20

**Stretching combined with repetitive small length changes of the plantar flexor muscles enhances their passive extensibility for longer duration than conventional static stretching, while not compromising strength**

Naoki Ikeda<sup>1\*</sup>¶, Takayuki Inami<sup>1&</sup>, Yasuo Kawakami<sup>1&</sup>

<sup>1</sup> Faculty of Sport Sciences, Waseda University, Tokorozawa, Saitama, Japan

\* Corresponding author:

E-mail: n.ikeda2@kurenai.waseda.jp (NI)

¶The author contributed equally to this work.

&These authors also contributed equally to this work.

Short title:

Effect of stretching combined with repetitive small length changes of the plantar flexors

## 21 **Abstract**

22       Static stretching increases flexibility but can decrease muscle strength, and the method to  
23 avoid the latter has been longed for. In this study, a novel stretching modality was developed  
24 that provides repetitive small length changes to the plantar flexor muscles undergoing passive  
25 static stretching (“local vibration stretching,”). We investigated the effects of local vibration  
26 stretching on muscle strength, flexibility and its persistence. Plantar flexion strength and  
27 maximal ankle joint dorsiflexion angle (dorsiflexion range of motion) were measured for 10  
28 healthy young males before (pre) and immediately after (post) three types of stretching: static  
29 stretching, local vibration stretching at 15 Hz, and no intervention (control). The dorsiflexion  
30 range of motion was measured also at 15, 30, and 60 min post-stretching. Elongation of the  
31 medial gastrocnemius and Achilles tendon was determined by ultrasonography. Plantar  
32 flexion strength significantly decreased by  $4.3 \pm 3.5$  % in static stretching but not in local  
33 vibration stretching. The dorsiflexion range of motion significantly increased both in static  
34 stretching ( $7.2 \pm 8.1$  %) and local vibration stretching ( $11.2 \pm 14.6$  %) which was  
35 accompanied by a significantly larger muscle elongation but not tendon elongation. Elevated  
36 dorsiflexion range of motion was maintained until 30 min after the local vibration stretching  
37 while it returned to baseline level (pre- intervention) in 15 min after the static stretching.  
38 All variables remained unchanged in the control condition. In conclusion, local vibration  
39 stretching improves extensibility of the muscle belly without decreasing strength, and the  
40 increased flexibility is retained longer than static stretching.

41

## 42 **Introduction**

43       Modalities to improve flexibility (joint range of motion) are roughly divided into static  
44 stretching (SS) in which muscles are stretched while holding the joint at a fixed angle, and  
45 dynamic stretching (DS) where muscles experience dynamic stretch–shortening within the  
46 maximal range of motion. Although flexibility can be significantly improved after static  
47 stretching, muscle strength and functions are often attenuated [1,2]. The latter outcome has  
48 been attributed to the reduction of the neural drive [3,4,5] and a decrease in the muscle-  
49 tendon unit (MTU) stiffness [3,6,7]. In contrast, DS provides a smaller effect on flexibility  
50 than static stretching but it does not sizably attenuate muscle functions [8,9,10]. Possible  
51 factors involved in DS include dynamic stretching and shortening of actively contracting  
52 muscles, which might be responsible for the smaller negative effect of DS on muscle  
53 functions. This can be due to a retained neural drive and/or a negligible change in MTU  
54 stiffness after DS [10,11].

55       Previous animal [12] as well as human [13] studies showed a decrease in MTU or muscle  
56 stiffness that underwent cyclic stretch–shortening cycles passively. There is a possibility that  
57 such a modality leads to further improvement of flexibility than DS, while posing no negative  
58 effect on muscle functions unlike SS. Performing DS passively and cyclically with a small  
59 range of joint angle (5° for instance), can be such a modality. When this maneuver is  
60 performed at a relatively high frequency, it can be regarded as “vibration”. Vibration stimuli  
61 to the body or muscles provide a positive effect on muscle functions, e.g., muscle force  
62 enhancement [14,15,16], and also improves flexibility [14,17]. Thus, a modality that  
63 conditions the MTU by SS combined with dynamic length changes by vibration will be  
64 effective in improving muscle stiffness while retaining muscle functions. To the best of our  
65 knowledge, no study has ever tried such a stretching maneuver.

66 In the present study we developed a novel stretching technique which employs the feature  
67 of DS (in the form of vibration) added onto SS, for the purpose to take advantages of both SS  
68 and DS. We named this technique as “local vibration stretching (LVS)”. Attempts to apply  
69 vibration stimuli to the target muscles undergoing static stretching have been performed  
70 [18,19]. In those studies, vibration stimuli were applied using a vibrator on the muscle belly  
71 [18] or a whole-body vibration device [19]. The vibration amplitude was very small in those  
72 approaches with its direction not specified along the target muscles. The present concept of  
73 LVS is essentially different from those approaches because the vibration stimulus with a  
74 sizable amplitude (15mm: ankle joint angle change of approximately 5°) is provided to the  
75 major plantar flexors, thereby applying repetitive small length changes of MTU like DS  
76 under passive stretching.

77 The altered flexibility is reported to persist for 10 - 30 min [2,10]. after static stretching,  
78 and at least 10 min after the DS [11], and at least 15 min after the vibration stimulus [17].  
79 Combination of these interventions may further elongate their after-effects, but this idea has  
80 not been tested.

81 In the present study, we conducted the experiment on the MTU of the lower leg for the  
82 purpose of verifying the effects of LVS on muscle strength, flexibility, and persistence of  
83 altered flexibility. It was hypothesized that LVS does not decrease muscle strength while  
84 improving and maintaining flexibility similarly to static stretching.

85

## 86 **Materials and methods**

### 87 **Participants**

88 The participants were 10 recreationally active males without apparent neurological,  
89 orthopedic, or neuromuscular problems of their lower legs (age,  $22 \pm 2$  years; body height,  
90  $1.70 \pm 0.06$  m; body weight,  $64.3 \pm 8.9$  kg; mean  $\pm$  SD). The details and purpose of this study

91 as well as the risk associated with participating in this study was explained to each participant  
92 in advance, before obtaining consensus for participation. This study was approved by the  
93 Ethics Review Committee on Human Research of Waseda University and performed in  
94 accordance with the Declaration of Helsinki.

95

## 96 **Study Design**

97 The present study was aimed to clarify the effects of LVS on muscle strength, flexibility,  
98 and persistence of altered flexibility, and comparing those effects with SS. The right ankle  
99 joint was tested for all participants, in the following three conditions: SS intervention, LVS  
100 intervention, and no stretching (control). The participants were tested under these conditions  
101 in a random order, with an interval of 3 days or longer, after measuring the maximal  
102 voluntary plantar flexion torque to determine the basis for dorsiflexion range of motion  
103 (DFROM) measurement as described later.

104

## 105 **Measurement of maximal voluntary muscle strength**

106 Isometric maximal voluntary plantar flexion torque was measured by using an isokinetic  
107 dynamometer (VTF-002, VINE, Japan), with the knee fully extended in a sitting position, and  
108 the ankle secured to a foot plate of the dynamometer at 0° (anatomical position). The signal  
109 obtained from the dynamometer was amplified by an amplifier (DPM-711B, Kyowa, Japan),  
110 then digitally converted at 1000 Hz through an A/D converter (PowerLab/16SP,  
111 ADInstruments, Australia), fed into a personal computer (FMV Lifebook, Fujitsu, Japan) and  
112 recorded by using a software (LabChart7, ADInstruments, Australia). Before measuring  
113 maximal voluntary plantar flexion torque twice, the participants were instructed to warm-up,  
114 producing force below the maximal strength for several times. The peak torque was analyzed  
115 per measurement, and the third measurement was performed when the values differed by 5%

116 in two measurements. The higher value in two measurements was taken as maximal  
117 voluntary plantar flexion torque. Maximal voluntary plantar flexion torque was measured  
118 before and immediately after the intervention.

119

## 120 **Measurement of dorsiflexion range of motion**

121 Flexibility was measured as DFROM by using the same isokinetic dynamometer used in  
122 maximal voluntary plantar flexion torque measurement (Fig 1). The ankle joint was  
123 dorsiflexed at 5°/s starting from 30° plantar flexion, until the passive resistive torque  
124 corresponding to 20% of the pre-measured maximal voluntary plantar flexion torque was  
125 reached when the DFROM was measured. The participants were instructed to relax during  
126 the measurements without resisting to the passive dorsiflexion. The right foot region  
127 including the distal part of the lower leg was videotaped (Exilim, Casio, Japan) at 30 Hz to  
128 obtain the joint angle. For this purpose, reflective markers were attached onto the following  
129 four landmarks: the upper and lower side of the foot plate, medial malleolus, and tibia (the  
130 middle point of the line between the estimated center of the knee joint and the medial  
131 malleolus). In the recorded image, the two-dimensional coordinates of those markers were  
132 obtained by using a software (FrameDIAS4, DKH, Japan), and the angle between the vectors  
133 parallel to the foot plate and the line from the medial malleolus to the tibia was defined as the  
134 ankle joint angle, being 0° at the neutral position and positive values for dorsiflexion. The  
135 video was synchronized with other data using a synchronizer (PH-100, DKH, Japan). The  
136 measurement was repeated twice, and the higher value was adopted. DFROM was measured  
137 before, immediately after the intervention (POST), and at 15min (POST 15), 30min (POST  
138 30), and 60min (POST 60) post-stretching to examine the persistence of altered flexibility.

139 **Fig 1. Illustration of DFROM measurement and muscle lengthening.**

140

## 141 **Measurement of muscle and tendon elongations**

142 During DFROM measurement pre- and post-intervention, the proximo-distal movement of  
143 the distal end of muscle belly of the medial gastrocnemius was recorded by using an  
144 ultrasonic apparatus (SSD-6500, ALOKA, Japan, connected to a video recorder GV-HD700,  
145 SONY, Japan operating at 30 Hz) to represent muscle elongation [21] (Fig 1). The ultrasonic  
146 probe (frequency: 7.5MHz; scan width: 60 mm; UST-5712, Hitachi Aloka Medical, Japan)  
147 was fixed onto the skin with a double-sided adhesive tape above the distal end of muscle  
148 belly of the medial gastrocnemius. The videotaped ultrasound images were later analyzed  
149 using a software (FrameDIAS4, DKH, Japan) to measure the muscle elongation from the  
150 position of 30° plantar flexion up to DFROM.

151 The changes in the length of the medial gastrocnemius–Achilles tendon MTU from 30°  
152 plantar flexion to DFROM were estimated by using the following formula [20],

153

$$154 \quad \text{MTU length change (mm)} = \frac{(-22.18468 + 0.30141 \times (90 - \text{AJA}) - 0.00061 \times (90 - \text{KJA})^2 + 6.46251) \times L}{100} \quad (1)$$

155 (AJA: ankle joint angle (90° = anatomical position), KJA: knee joint angle (0° = full  
156 extension position), L: lower leg length (linear distance [mm] from the popliteal fossa to the  
157 lateral malleolus of the ankle joint)

158

159 The difference between the change in MTU length and muscle elongation was defined as  
160 tendon elongation [21]. The analysis was repeated twice per measurement, and the mean  
161 value was adopted. The coefficient of variation of muscle elongation was 0.88% in two  
162 measurements on the same participant.

163

## 164 **Stretching protocol**

165 For both SS and LVS, an isokinetic dynamometer (CON-TREX, CMV, Switzerland) with  
166 a dynamic stretching device (JM-25, TOPRUN, Japan) mounted on the foot plate, was used.  
167 The posture of the participants was the same as that of the DFROM measurement. Based on a  
168 previous study [22], the stretching duration was 15min in total for both SS and LVS (15 sets  
169 of 1-min stretching, with an interval of 30s). The dorsiflexion angle for SS was set at the  
170 same angle as in the maximal joint angle during DFROM measurement at pre- intervention.  
171 For LVS, a dynamic stretching device plantar- and dorsiflexed the ankle by approximately 5°  
172 (Fig 2) at 15 Hz for 1min, around the same position as in SS. The selection of vibration  
173 frequency of 15 Hz was to avoid mechanical stress to the muscle and the feeling of  
174 discomfort and pain that were brought about at higher vibration frequencies in a preliminary  
175 experiment. The ankle joint angle was positioned at 0° during the interval between sets of  
176 LVS. In control, the participants were instructed to sit at rest on the dynamometer for  
177 approximately 25 min, while maintaining the right knee and ankle joints lightly flexed and  
178 plantar flexed to avoid stretching of plantar flexors.

179 **Fig 2. A picture showing implementation of local vibration stretching.**

180

## 181 **Statistical analysis**

182 All data are presented in means  $\pm$  SD. For the values of maximal voluntary plantar flexion  
183 torque, DFROM, and muscle and tendon elongations before (pre) and after (post)  
184 intervention, two-way repeated measures analysis of variance (ANOVA) was performed on  
185 the stretching conditions (control, SS, and LVS)  $\times$  time (pre and immediately post) (SPSS  
186 12.0J, SPSS Japan, Japan). When an interaction or a main effect for time was observed, a  
187 paired t-test was performed in each condition. The time course changes in flexibility were  
188 compared for each condition. The relative changes in maximal voluntary plantar flexion  
189 torque, DFROM, muscle, and tendon elongations before and immediately after intervention



190 were examined for statistical differences using one-way repeated measures ANOVA. When  
191 the F value was significant, a Tukey multiple comparison test was performed. For SS and  
192 LVS conditions, DFROM values at POST, POST 15, POST 30, and POST 60 were  
193 normalized to the pre-measurement values. A two-way repeated ANOVA was performed on  
194 the stretching conditions (SS and LVS)  $\times$  time (POST, POST 15, POST 30, and POST 60).  
195 When a significant interaction or a main effect for time was observed, a one-way repeated  
196 measures ANOVA with least significant difference (LSD) post-hoc test was performed in  
197 each condition. Significant differences among pre-measurement values in different conditions  
198 were assessed by one-way repeated measures ANOVA for all parameters. The level of  
199 statistical significance was set at  $p < 0.05$ .

200

## 201 **Results**

202 A significant interaction between the conditions and time was observed in maximal  
203 voluntary plantar flexion torque, and maximal voluntary plantar flexion torque significantly  
204 decreased in SS after intervention, whereas no change was observed in control or LVS (Fig  
205 3). The relative change of maximal voluntary plantar flexion torque after intervention in SS (-  
206  $4.3 \pm 3.5\%$ ) was significantly different from that in control ( $0.0 \pm 2.9\%$ ), whereas no  
207 significant difference was observed between LVS ( $-1.6 \pm 3.9\%$ ) and control.

208 **Fig 3. Changes in maximal voluntary isometric plantar flexion torque in each condition.**

209 CON: control; SS: static stretching; LVS: local vibration stretching. \*: significantly changed  
210 compared with pre- intervention ( $p < 0.05$ ). Values are means  $\pm$ SD

211

212 The main effect for time was observed in DFROM, and it significantly increased both in  
213 SS and LVS but not in control (Fig 4). The relative change of DFROM after intervention in  
214 LVS ( $11.2 \pm 14.6\%$ ) was significantly higher than that in control ( $-0.7 \pm 4.0\%$ ), whereas no

215 significant difference was observed between LVS and SS ( $7.2 \pm 8.1\%$ ), and between SS and  
216 control.

217 **Fig 4. Changes in the dorsiflexion range of motion in each condition.**

218 CON: control; SS: static stretching; LVS: local vibration stretching. \*: significantly changed  
219 compared with pre- intervention ( $p < 0.05$ ). Values are means  $\pm$ SD

220

221 The interaction was observed between conditions and time in muscle elongation, and it  
222 significantly increased both in SS and LVS, whereas no change was observed in control (Fig  
223 5). The relative change of muscle elongation after intervention in LVS ( $8.5 \pm 10.2\%$ ) was  
224 significantly higher than that in control ( $-0.8 \pm 3.2\%$ ), whereas no significant difference was  
225 observed between LVS and SS ( $5.8 \pm 6.2\%$ ), and between SS and control. As for the tendon  
226 elongation, the main effect for time was not significant, and no change in any conditions was  
227 observed (Fig 6).

228 **Fig 5. Changes in muscle elongation in each condition.**

229 CON: control; SS: static stretching; LVS: local vibration stretching. \*: significantly changed  
230 compared with pre- intervention ( $p < 0.05$ ). Values are means  $\pm$ SD ( $n = 9$ )

231 **Fig 6. Changes in Achilles tendon elongation in each condition.**

232 CON: control; SS: static stretching; LVS: local vibration stretching. No significant difference  
233 was observed before and after intervention the conditions ( $p > 0.05$ ). Values are means  $\pm$ SD  
234 ( $n = 9$ )

235

236 The main effect for time was observed in the change of DFROM relative to the pre-  
237 intervention value: in SS, it was significantly smaller at POST15, POST30 and POST60  
238 compared with POST while in LVS, it was significantly smaller at POST60 compared with  
239 POST, POST15 and POST30 (Table 1).

240 **Table 1: Time course of dorsiflexion range of motion in static stretching and local**  
241 **vibration stretching conditions.**

|                             | Static stretching (%) | Local vibration stretching (%) |
|-----------------------------|-----------------------|--------------------------------|
| Immediately post-stretching | 7.2 ± 8.1             | 11.2 ± 14.6                    |
| 15 min post-stretching      | 0.4 ± 7.9 *           | 10.7 ± 11.1                    |
| 30 min post-stretching      | 0.2 ± 10.6 *          | 5.5 ± 13.5                     |
| 60 min post-stretching      | -1.0 ± 9.4 *          | -2.0 ± 12.2 * † ‡              |

242 \*: significantly different compared with immediately post-stretching ( $p < 0.05$ ). †:  
243 significantly different compared with 15 min post-stretching ( $p < 0.05$ ). ‡: significantly  
244 different compared with 30 min post-stretching ( $p < 0.05$ ). Values at each time point are the  
245 relative changes from the pre-intervention values. Values are means ±SD.

246

## 247 Discussion

248 This study revealed the following effects of LVS that muscle strength was not  
249 compromised unlike SS, while DFROM was improved to a similar extent to SS. In addition,  
250 it was shown that the enhanced DFROM by LVS persisted longer than SS.

251 Previous studies reported muscle functions (e.g. muscle strength and power) declined after  
252 SS [1,4,10]. Our results for SS coincided with these studies. In contrast, maximal voluntary  
253 plantar flexion torque was unchanged in LVS, and the relative change of maximal voluntary  
254 plantar flexion torque in LVS was not different from that in control, unlike SS. Thus, LVS  
255 did not decrease muscle strength. SS is reported to decrease the neuromuscular activity  
256 during force production [4,10], but LVS is assumed not to reduce neuromuscular activity,  
257 because maximal voluntary plantar flexion torque was unchanged. In contrast, muscle  
258 strength/power can be improved after DS [8,10], and this has been attributed to 1)

259 conditioning effect through lengthening and shortening of MTU, and 2) active force  
260 production during DS, although their relative contributions are unknown. LVS provided  
261 passive and repetitive small length changes to the MTU undergoing SS without active force  
262 production, and the muscle strength was not improved. This result suggests that the above  
263 factor 2) is likely to be a dominant trigger for improvement of the muscle strength by DS.  
264 Although muscle strength transiently increases after being vibrated at about 30Hz [16], this  
265 finding is not directly compared to the present study because vibration modalities are  
266 completely different as mentioned above.

267 DFROM significantly and similarly increased in SS and LVS. This suggests that DFROM  
268 was increased by LVS with a SS-like effect on the plantar flexor MTU by dorsiflexing the  
269 ankle into the final ROM similarly to SS. An increase in muscle elongation due to SS has  
270 been thought to be caused by a decrease in passive muscle stiffness and changes in  
271 neurophysiological properties including lowered stretch-reflex sensitivity [2,6,23,24]. Muscle  
272 elongation was comparable for LVS and SS, suggesting that the muscle was similarly  
273 affected by these two interventions, but there also was a tendency of the former (9%) being  
274 larger than the latter (6%). This could be explained by a greater decrease in muscle stiffness  
275 in LVS compared with SS resulting from passive and cyclic stretch-shortening cycle (as  
276 passive DS) and vibration stimuli [2,25,26].

277 No change was observed in tendon elongation in SS or LVS. The load-elongation  
278 relationship of the tendinous tissue is divided into the toe region (larger and nonlinear  
279 elongation to a smaller tensile force) and the linear region (stiffer and linear elongation-  
280 tension relation) [27,28]. DFROM measurement in both SS and LVS was performed at the  
281 intensity corresponding to 20%MVC, which may have been within the toe region of the  
282 tendon force-length relationship where the effect of stretching on the tendon is not influential  
283 [4,29].

284 The improved flexibility subsided after 30 min in LVS, while within 15 min in SS.  
285 Previous studies reported persistence of altered flexibility being 10 min [7] or 30 min [2]  
286 after SS, 10 min after DS [11], and 15 min after vibration stimulus alone [17]. The  
287 persistence of altered flexibility in this study differs from these reports. This may be because  
288 of the differences in methodology, e.g., duration and intensity of interventions.  
289 Neurophysiological changes caused by SS can affect the persistence of altered flexibility for  
290 ~2 min, and changes in mechanical properties of muscular and tendinous tissues can keep  
291 altered flexibility for 8 min~ [30]. It appears therefore, that the persisting effect of LVS on  
292 flexibility is due to changes in muscle and tendon mechanical properties. Although further  
293 studies are required to clarify this mechanism, the present study indicated that LVS enhanced  
294 DFROM and it persisted longer than SS.

295 In the present study, muscle activities were not measured; hence the extent of  
296 neuromuscular activity during measurement and stretching is unknown and the above related  
297 arguments remains largely speculative. The effects of LVS on neuromuscular activity are  
298 worth investigating in future studies. LVS developed in this study clearly differs from SS in  
299 that it provides repetitive small length changes to MTU longitudinally (unlike conventional  
300 segmental or whole-body vibration), and also differs from typical DS in terms of the lack of  
301 active force production; thus, LVS is a novel stretching technique. Examination of factors not  
302 dealt with in the present study, e.g., combinations of different stroke lengths and vibration  
303 frequencies, might lead to development of more effective application of LVS on flexibility  
304 and exercise performance improvement.

305

## 306 **Conclusion**

307 This study revealed the following three effects of a newly developed stretching technique  
308 (local vibration stretching: LVS): 1) muscle strength is not compromised unlike SS, 2)

309 DFROM increases to a similar extent as SS, and 3) enhanced DFROM subsided after 30 min  
310 in LVS, while it persists longer than in SS.

311

312

## 313 **Acknowledgments**

314 We sincerely thank Kohei Akase (former undergraduate student at the School of Sport  
315 Science, Waseda University) for his cooperation. This study was supported by the JSPS  
316 KAKENHI (Grant Number 16H01870).

317

## 318 **References**

- 319 1. Herda TJ, Cramer JT, Ryan ED, McHugh MP, Stout JR. Acute effects of static versus  
320 dynamic stretching on isometric peak torque, electromyography, and mechanomyography of  
321 the biceps femoris muscle. *J Strength Cond Res* 2008; 22: 809-817
- 322 2. Mizuno T, Matsumoto M, Umemura Y. Viscoelasticity of the muscle–tendon unit is  
323 returned more rapidly than range of motion after stretching. *Scand J Med Sci Sports* 2013;  
324 23: 23-30
- 325 3. Fowles J, Sale D, MacDougall J. Reduced strength after passive stretch of the human  
326 plantarflexors. *J Appl Physiol* 2000; 89: 1179-1188
- 327 4. Kay AD, Blazeovich AJ. Moderate-duration static stretch reduces active and passive  
328 plantar flexor moment but not Achilles tendon stiffness or active muscle length. *J Appl*  
329 *Physiol* 2009; 106: 1249-1256
- 330 5. Trajano GS, Nosaka K, Blazeovich AJ. Neurophysiological mechanisms underpinning  
331 stretch-induced force loss. *Sports Med.* 2017; 47: 1531-1541.
- 332 6. Morse CI, Degens H, Seynnes OR, Maganaris CN, Jones DA. The acute effect of  
333 stretching on the passive stiffness of the human gastrocnemius muscle tendon unit. *J Physiol*  
334 2008; 586: 97-106
- 335 7. Ryan ED, Beck TW, Herda TJ, Hull HR, Hartman MJ, Stout JR, et al. Do practical  
336 durations of stretching alter muscle strength? A dose - response study. *Med Sci Sports Exerc*  
337 2008; 40: 1529-1537

- 338 8. Yamaguchi T, Ishii K. Effects of static stretching for 30 seconds and dynamic  
339 stretching on leg extension power. *Journal of Strength and Conditioning Research* 2005; 19:  
340 677-683
- 341 9. Bacurau P, Monteiro A, Ugrinowitsch C, Tricoli V, Cabral LF, Aoki MS. Acute effect  
342 of a ballistic and a static stretching exercise bout on flexibility and maximal strength. *J*  
343 *Strength Cond Res* 2009; 23: 304-308
- 344 10. Sekir U, Arabaci R, Akova B, Kadagan SM. Acute effects of static and dynamic  
345 stretching on leg flexor and extensor isokinetic strength in elite women athletes. *Scand J Med*  
346 *Sci Sports* 2010; 20: 268-281
- 347 11. Mizuno T, Umemura Y. Dynamic stretching does not change the stiffness of the  
348 muscle-tendon unit. *Int J Sports Med* 2016; 37: 1044-1050
- 349 12. Mutungi G, Ranatunga K. Temperature-dependent changes in the viscoelasticity of  
350 intact resting mammalian (rat) fast-and slow-twitch muscle fibres. *J Physiol* 1998; 508: 253-  
351 265
- 352 13. Avela J, Finni T, Liikavainio T, Niemela E, Komi P. Neural and mechanical  
353 responses of the triceps surae muscle group after 1 h of repeated fast passive stretches. *J Appl*  
354 *Physiol* 2004; 96: 2325-2332
- 355 14. Cochrane D, Stannard S. Acute whole body vibration training increases vertical jump  
356 and flexibility performance in elite female field hockey players. *Br J Sports Med* 2005; 39:  
357 860-865
- 358 15. Luo J, McNamara B, Moran K. The use of vibration training to enhance muscle  
359 strength and power. *Sports Med* 2005; 35: 23-41
- 360 16. Cochrane DJ. The potential neural mechanisms of acute indirect vibration. *J Sport Sci*  
361 *Med* 2011; 10: 19-30



- 362 17. Gerodimos V, Zafeiridis A, Karatrantou K, Vasilopoulou T, Chanou K, Pispirikou  
363 E. The acute effects of different whole-body vibration amplitudes and frequencies on  
364 flexibility and vertical jumping performance. *J Sci Med Sport* 2010; 13: 438-443
- 365 18. Kinser AM, Ramsey MW, O'Bryant HS, Ayres CA, Sands WA, Stone MH. Vibration  
366 and stretching effects on flexibility and explosive strength in young gymnasts. *Med Sci*  
367 *Sports Exerc* 2008; 40: 133-140
- 368 19. Feland JB, Hawks M, Hopkins JT, Hunter I, Johnson AW, Eggett DL. Whole body  
369 vibration as an adjunct to static stretching. *Int J Sports Med* 2010; 31: 584-589
- 370 20. Grieve DW, Cavanagh PR, Pheasant S. Prediction of gastrocnemius length from knee  
371 and ankle joint posture. Assmussen E, Jorgensen K (ed). *International series on*  
372 *biomechanics, Biomechanics vol. 2*. Baltimore: University Park Press, 1978: 405-412
- 373 21. Kawakami Y, Kanehisa H, Fukunaga T. The relationship between passive ankle  
374 plantar flexion joint torque and gastrocnemius muscle and Achilles tendon stiffness:  
375 Implications for flexibility. *J Orthop Sports Phys Ther* 2008; 38: 269-276
- 376 22. Babault N, Kouassi L, Desbrosses K. Acute effects of 15 min static or contract-relax  
377 stretching modalities on plantar flexors neuromuscular properties. *J Sci Med Sport* 2010; 13:  
378 247-252
- 379 23. Weir D, Tingley J, Elder G. Acute passive stretching alters the mechanical properties  
380 of human plantar flexors and the optimal angle for maximal voluntary contraction. *Eur J Appl*  
381 *Physiol* 2005; 93: 614-623
- 382 24. Taniguchi K, Shinohara M, Nozaki S, Katayose M. Acute decrease in the stiffness of  
383 resting muscle belly due to static stretching. *Scand J Med Sci Sports* 2015; 25: 32-40
- 384 25. Issurin V. Vibrations and their applications in sport - A review. *J Sports Med Phys*  
385 *Fitness* 2005; 45: 324-336

- 386 26. Peer KS, Barkley JE, Knapp DM. The acute effects of local vibration therapy on  
387 ankle sprain and hamstring strain injuries. *Physician Sportsmed.* 2009; 37: 31-38.
- 388 27. Jozsa L, Kannus P. *Human tendons: Anatomy, physiology, and pathology.*  
389 Champaign: Human Kinetics. 1997.
- 390 28. Seynnes OR, Bojsen-Moller J, Albracht K, Arndt A, Cronin NJ, Finni T, et al.  
391 Ultrasound-based testing of tendon mechanical properties: A critical evaluation. *J Appl*  
392 *Physiol.* 2015; 118: 133-141.
- 393 29. Kubo K, Kanehisa H, Kawakami Y, Fukunaga T. Influence of static stretching on  
394 viscoelastic properties of human tendon structures in vivo. *J Appl Physiol* 2001; 90: 520-527
- 395 30. Magnusson S, Aagaard P, Nielson J. Passive energy return after repeated stretches of  
396 the hamstring muscle–tendon unit. *Med Sci Sports Exerc* 2000; 32: 1160-1164

397

## 398 **Supporting information**

399

400 **S1 Raw Data. Changes in strength, dorsiflexion range of motion (DFROM), time course**  
401 **of DFROM, muscle and tendon elongation of each participant in each condition.**

402

Passive  
dorsiflexion

bioRxiv preprint doi: <https://doi.org/10.1101/333864>; this version posted May 29, 2018. The copyright holder for this preprint (which was not certified by peer review) is the author/funder, who has granted bioRxiv a license to display the preprint in perpetuity. It is made available under aCC-BY 4.0 International license.

Probe

○ : The distal end of muscle belly

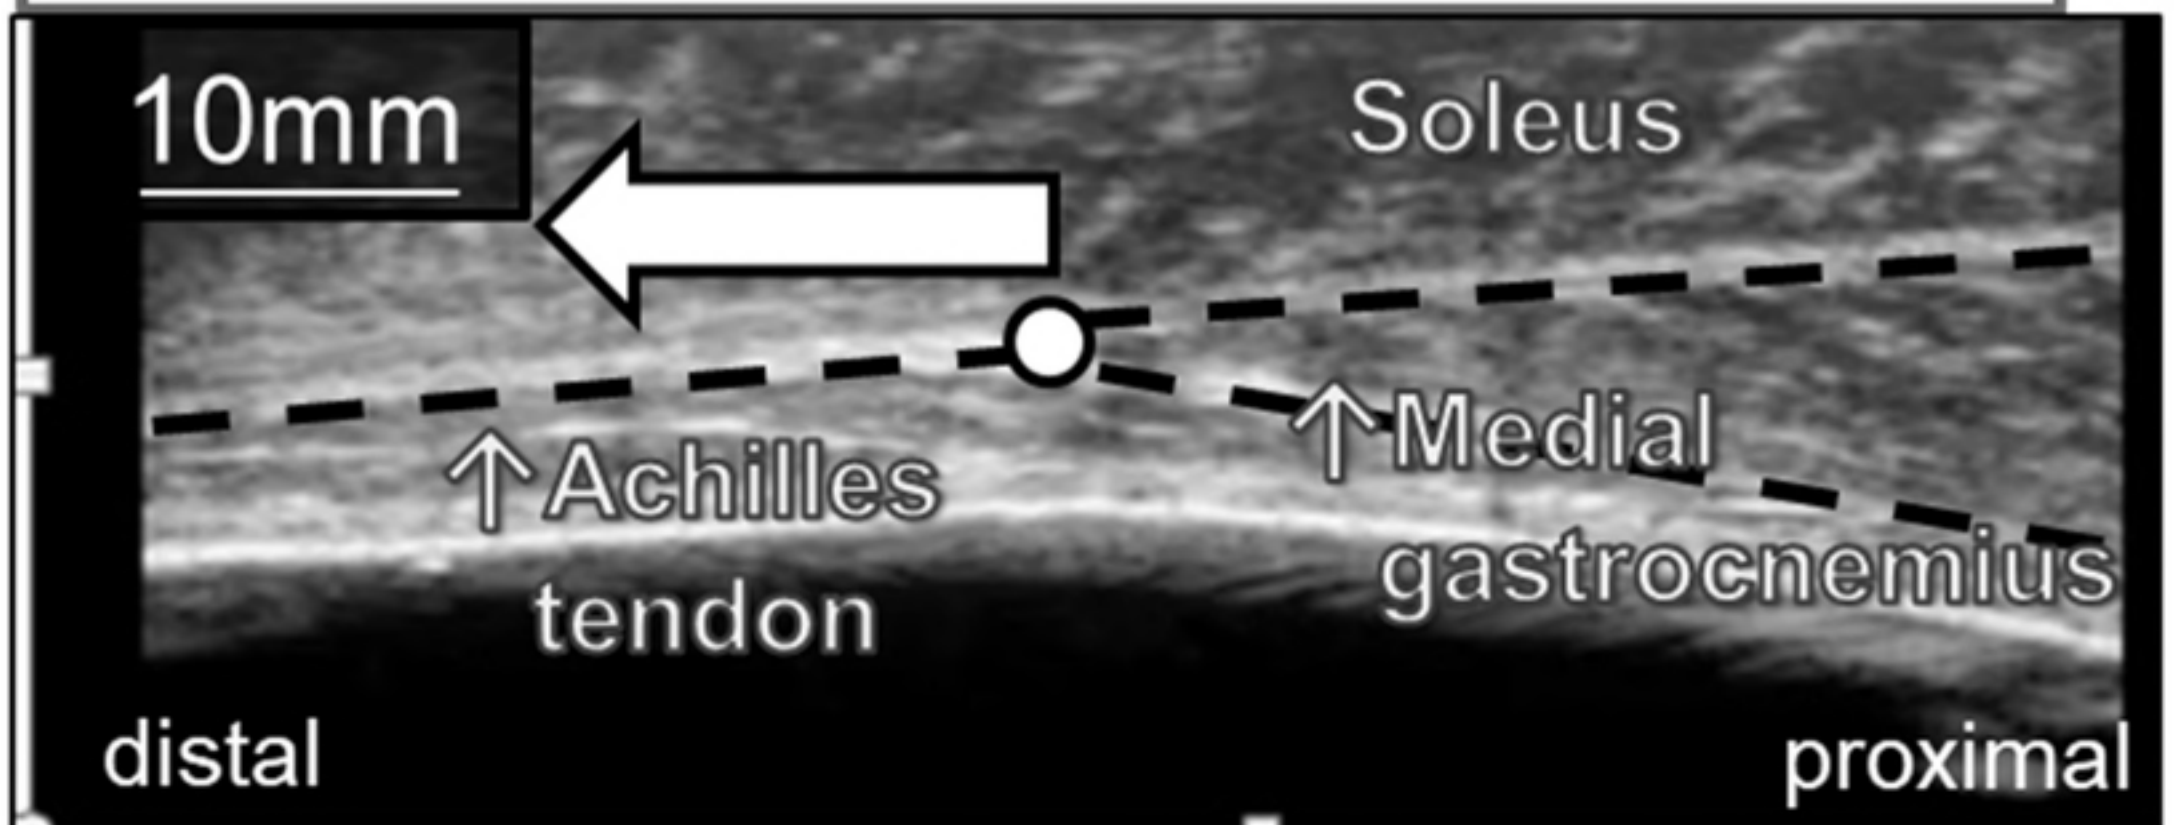

5° cyclic dorsiflexion

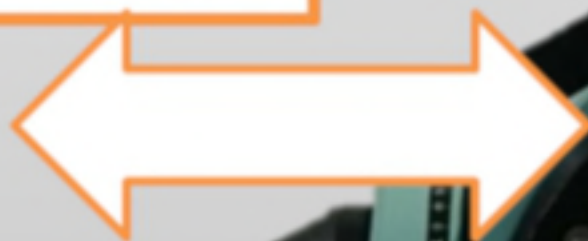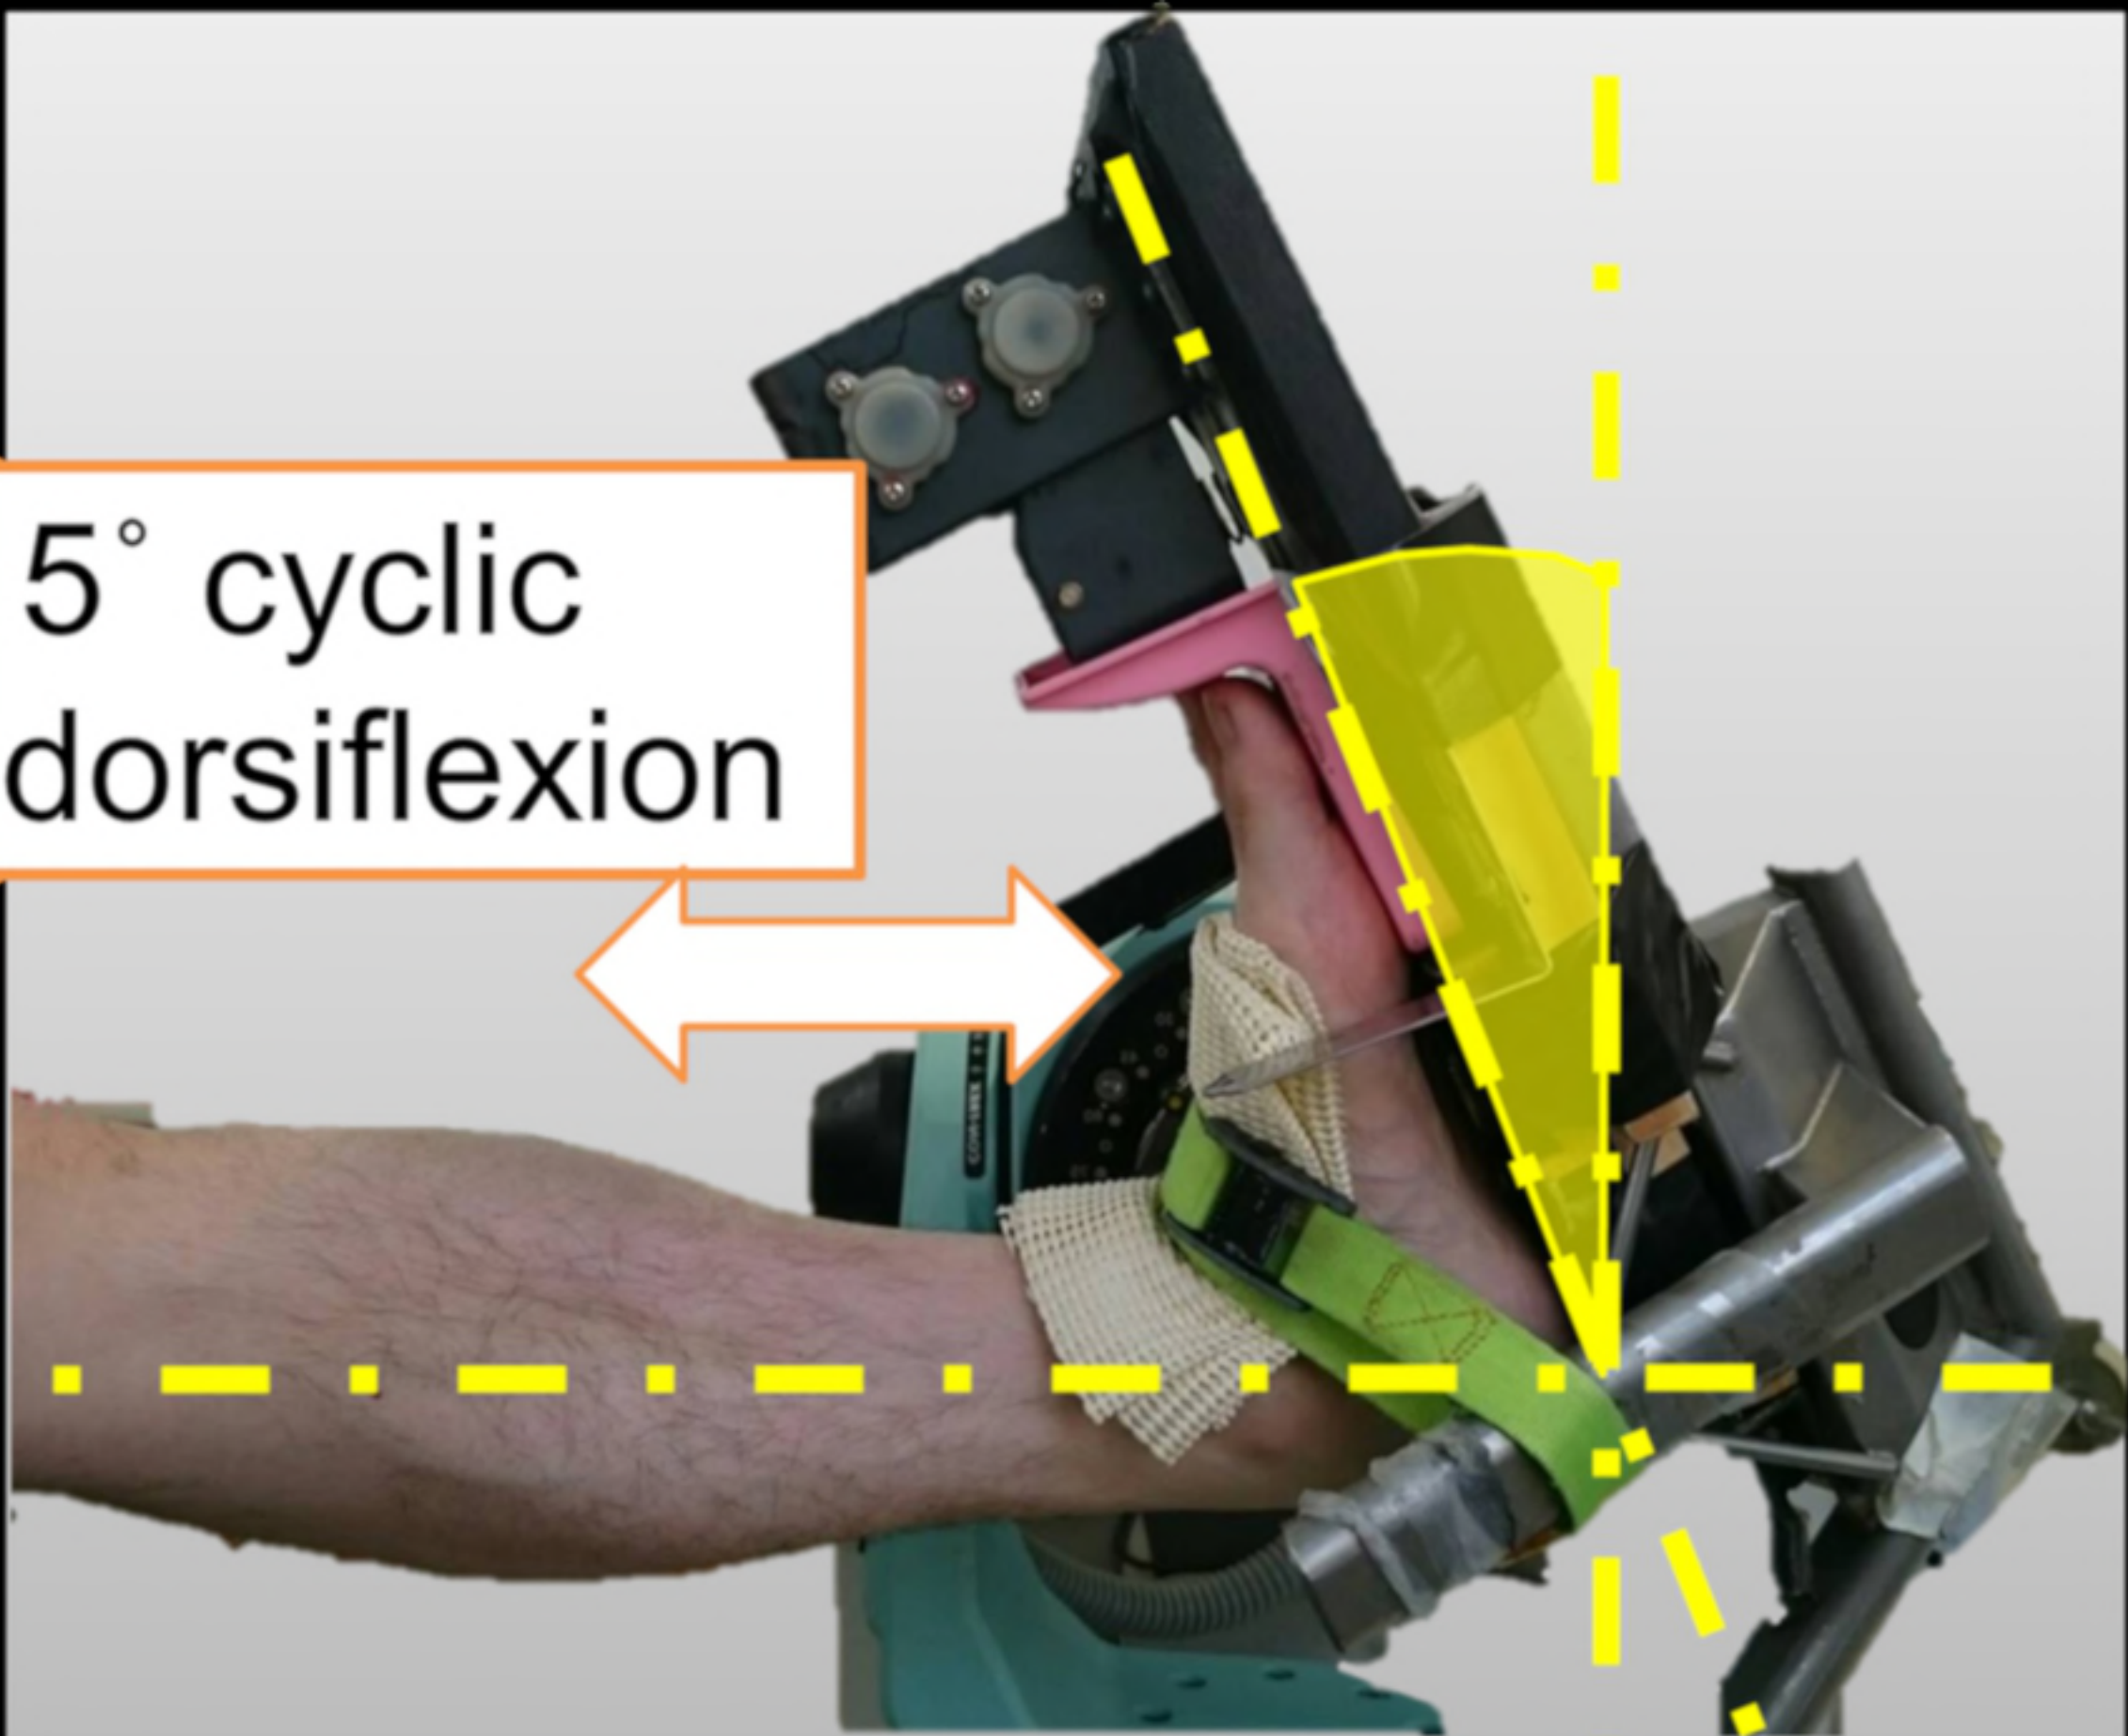

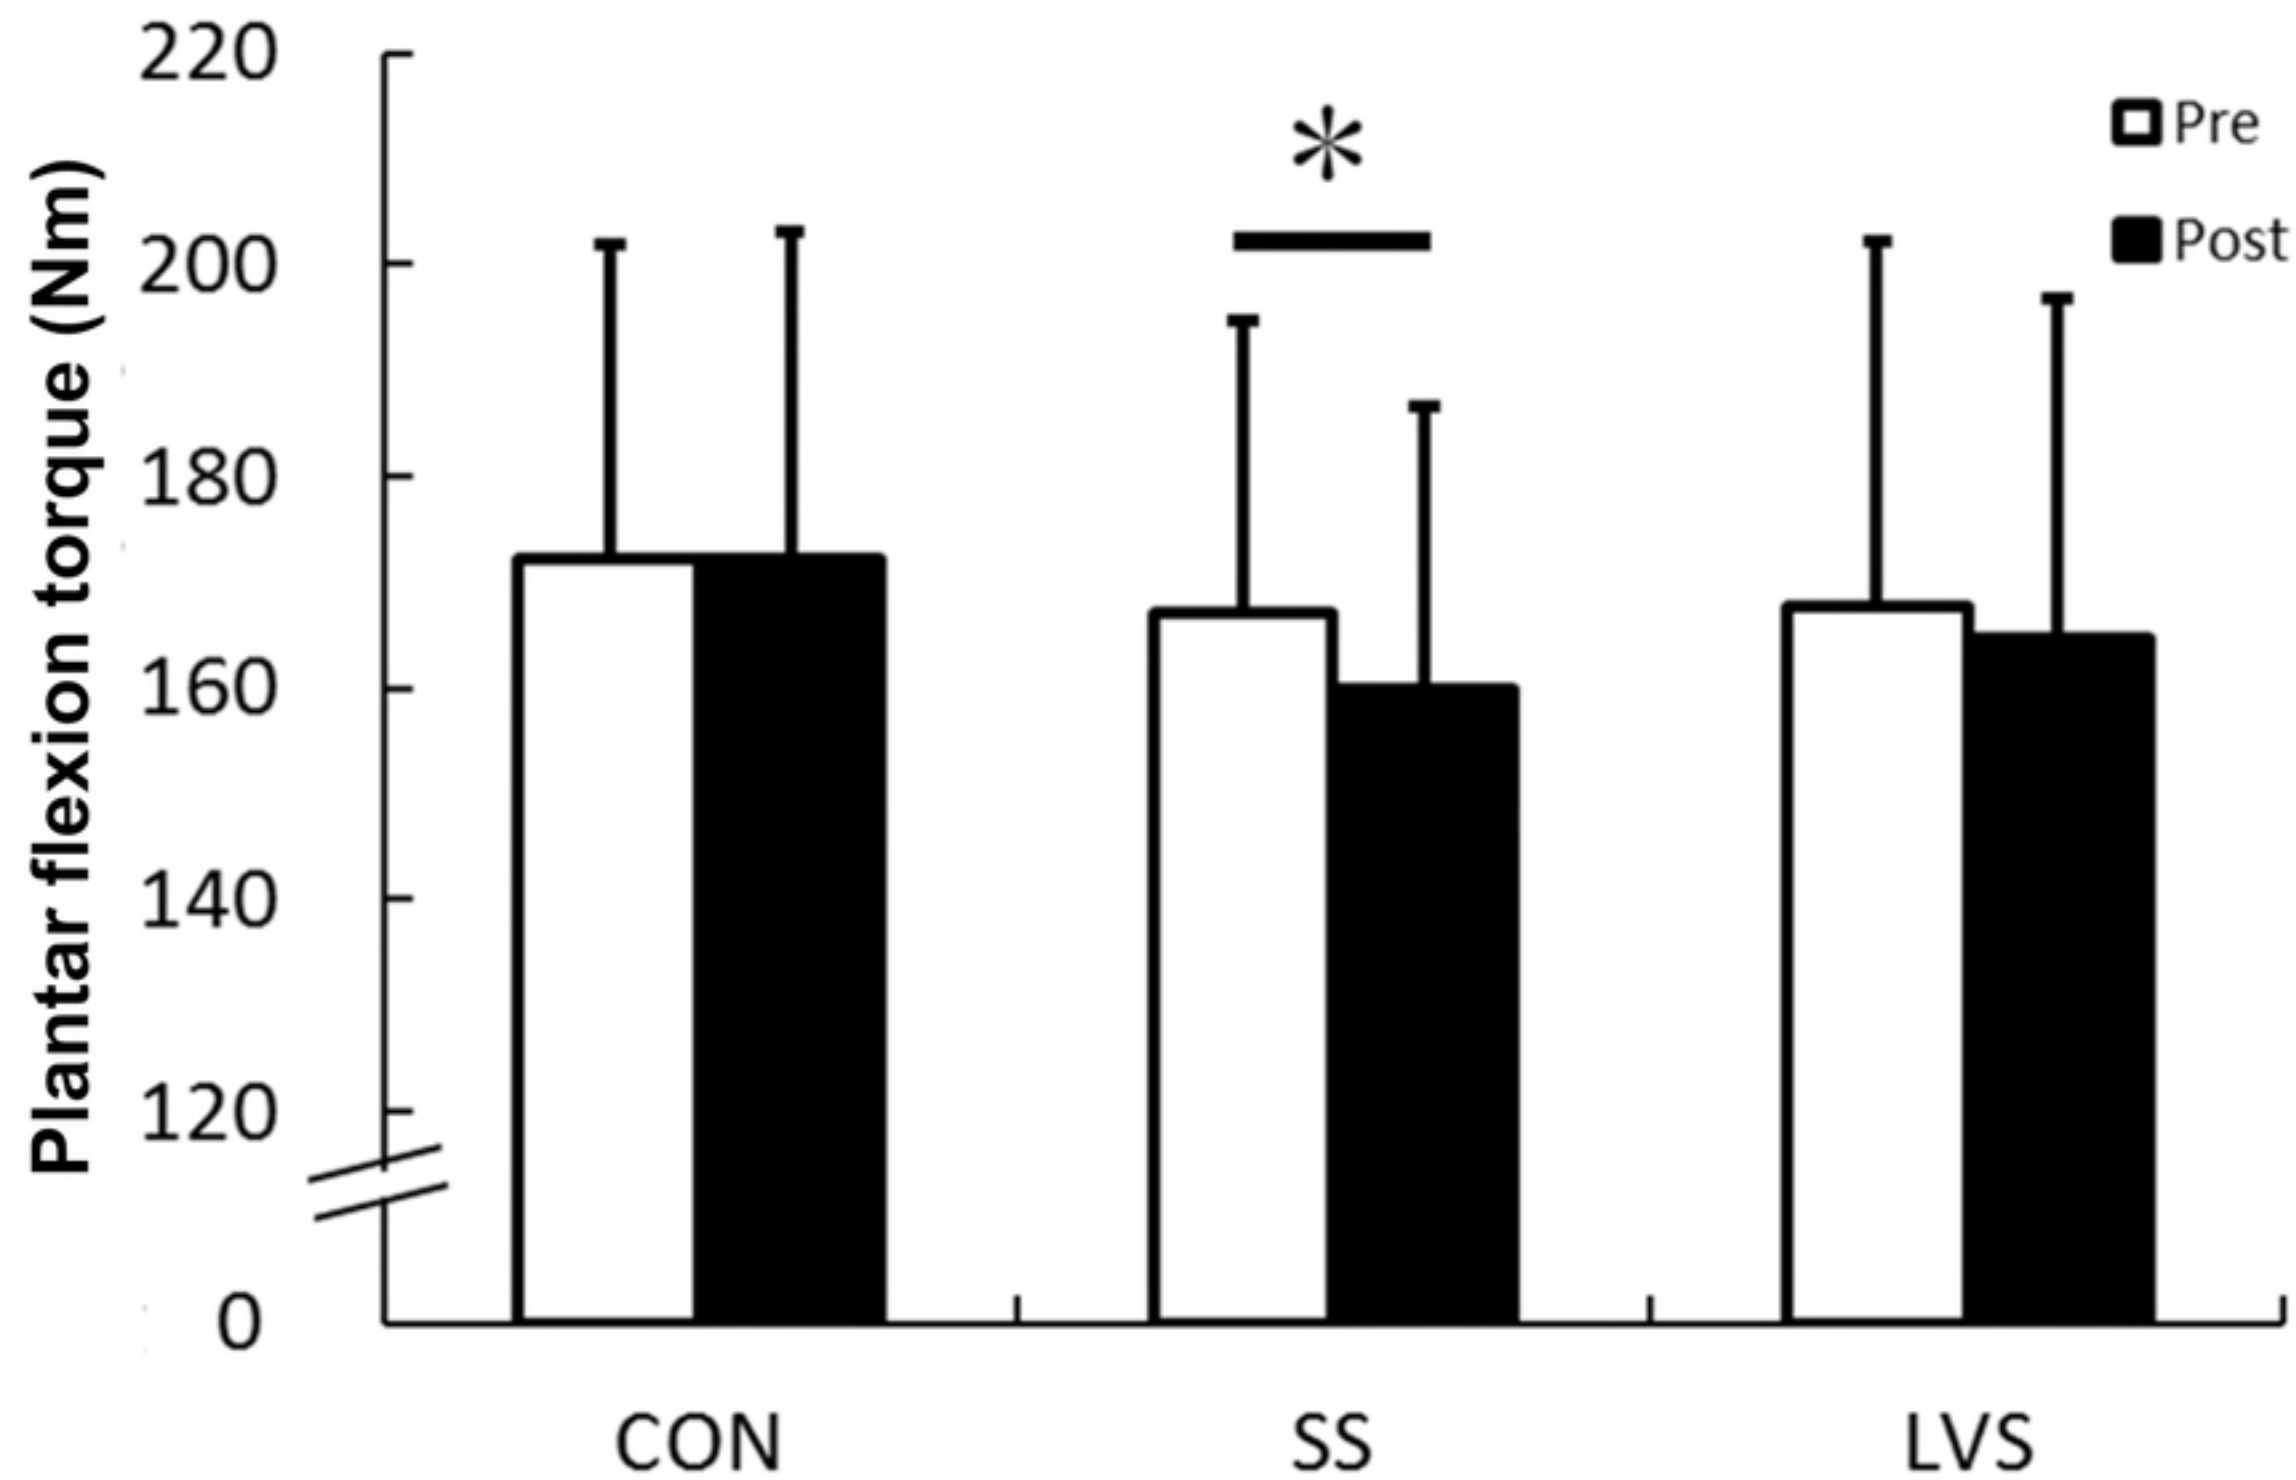

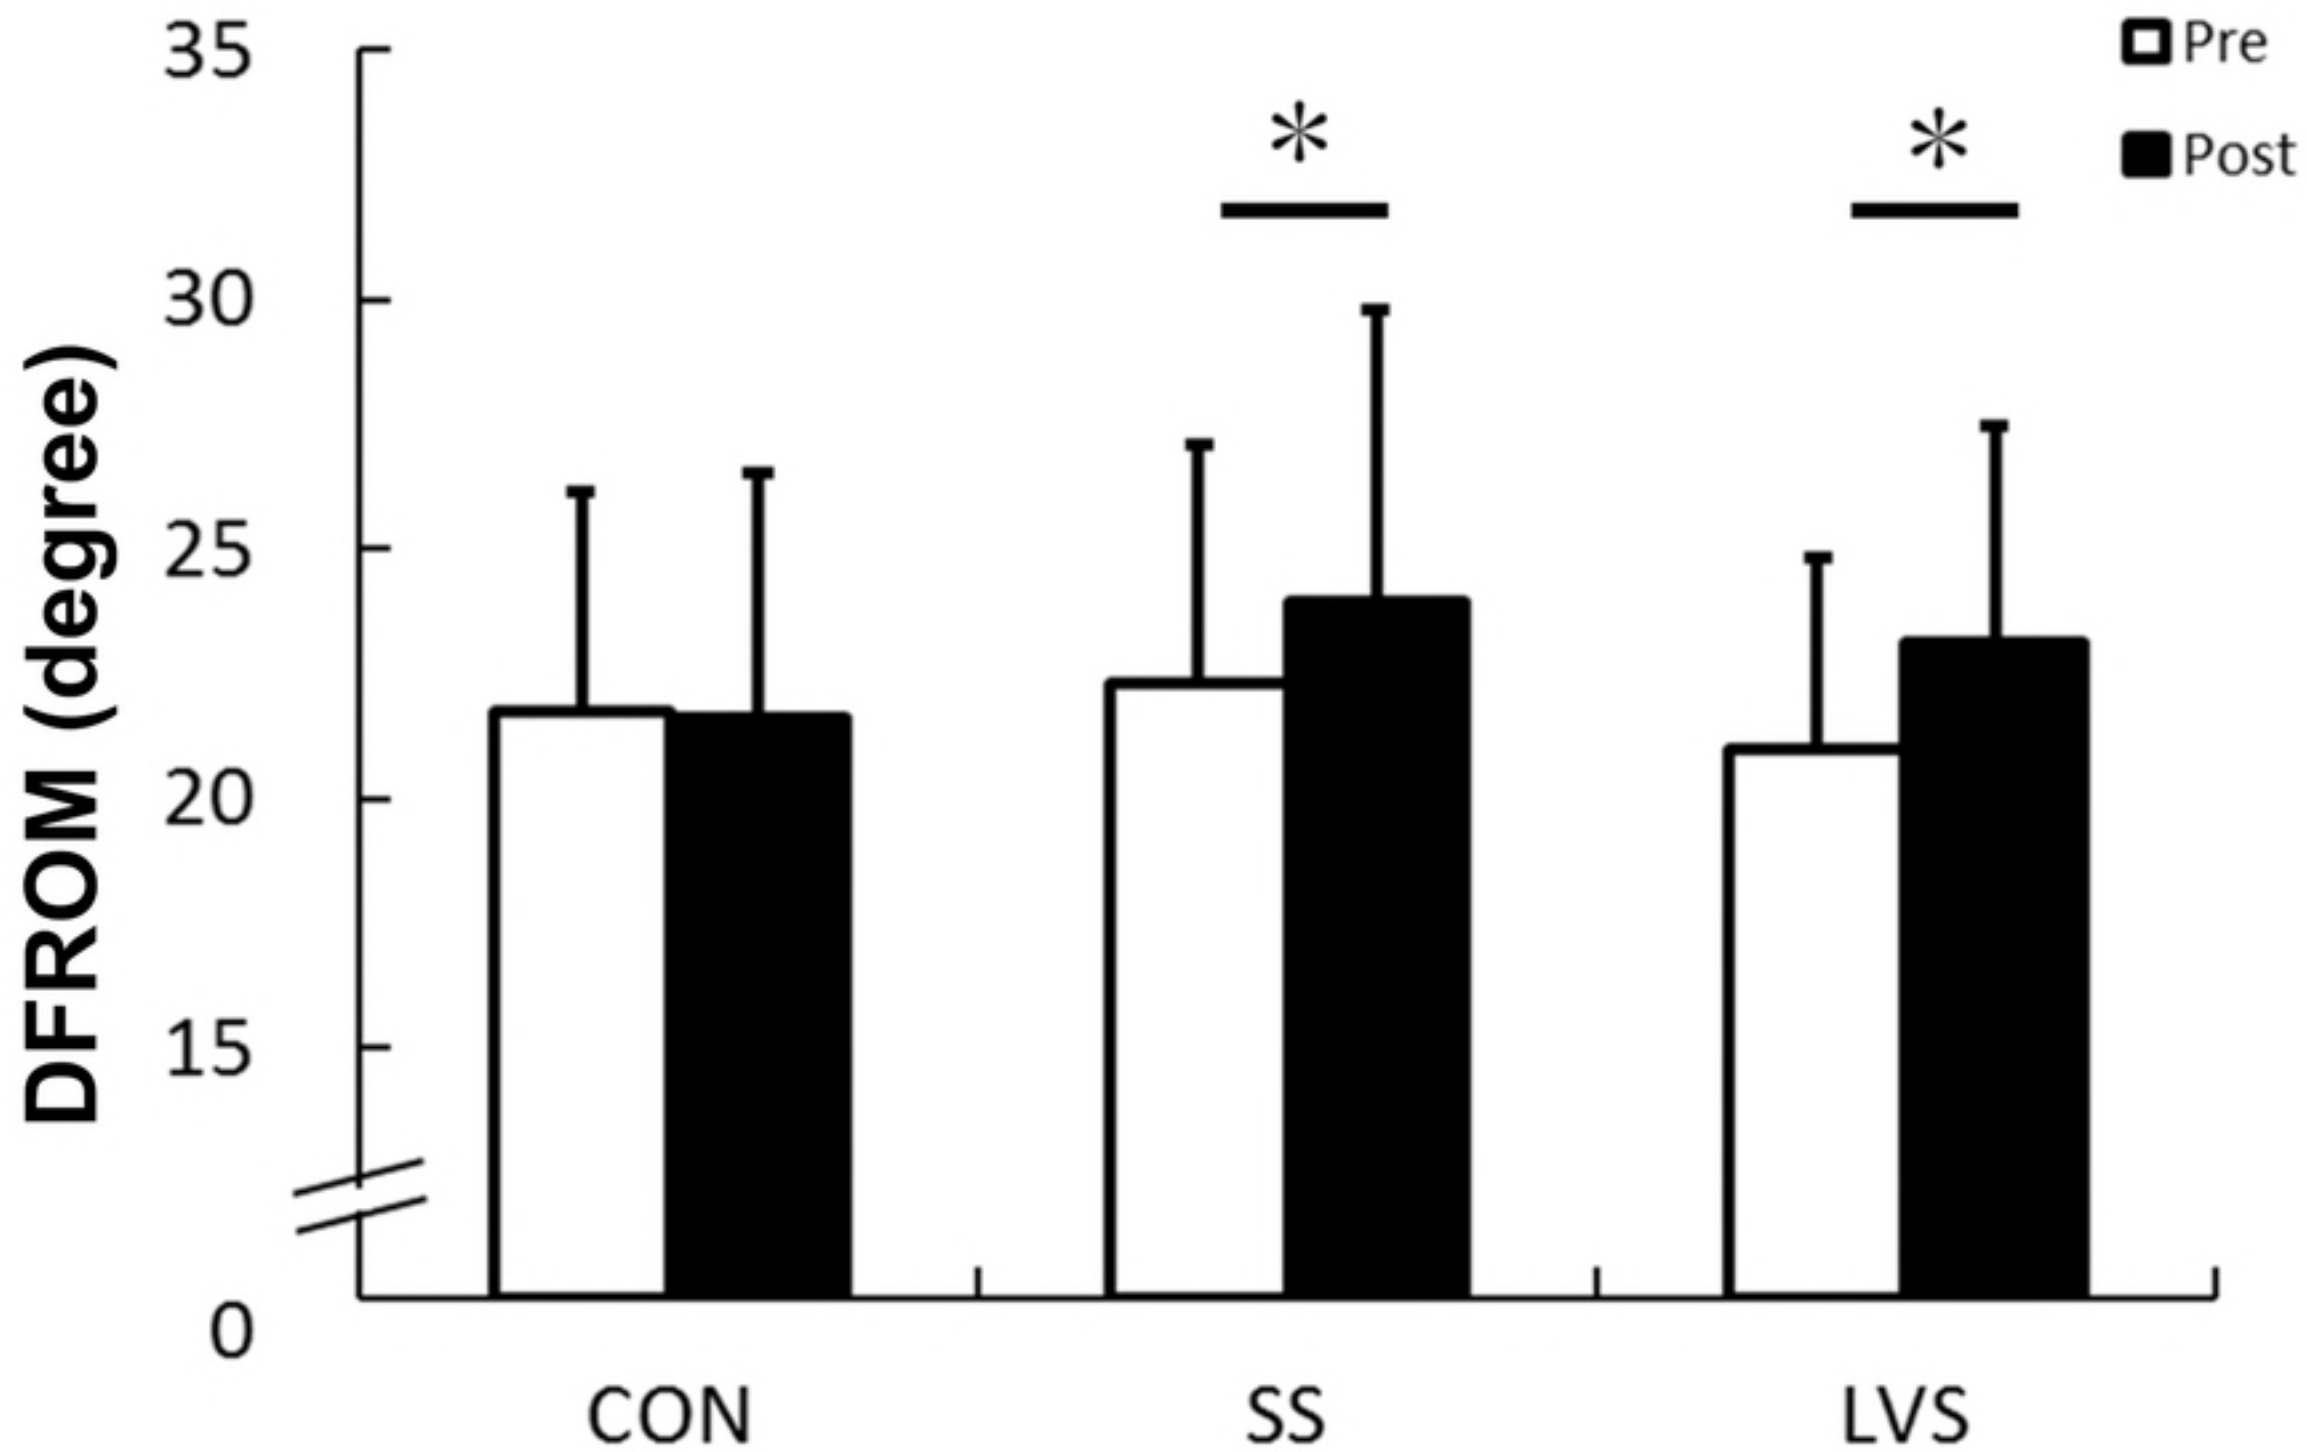

**Muscle elongation (mm)**

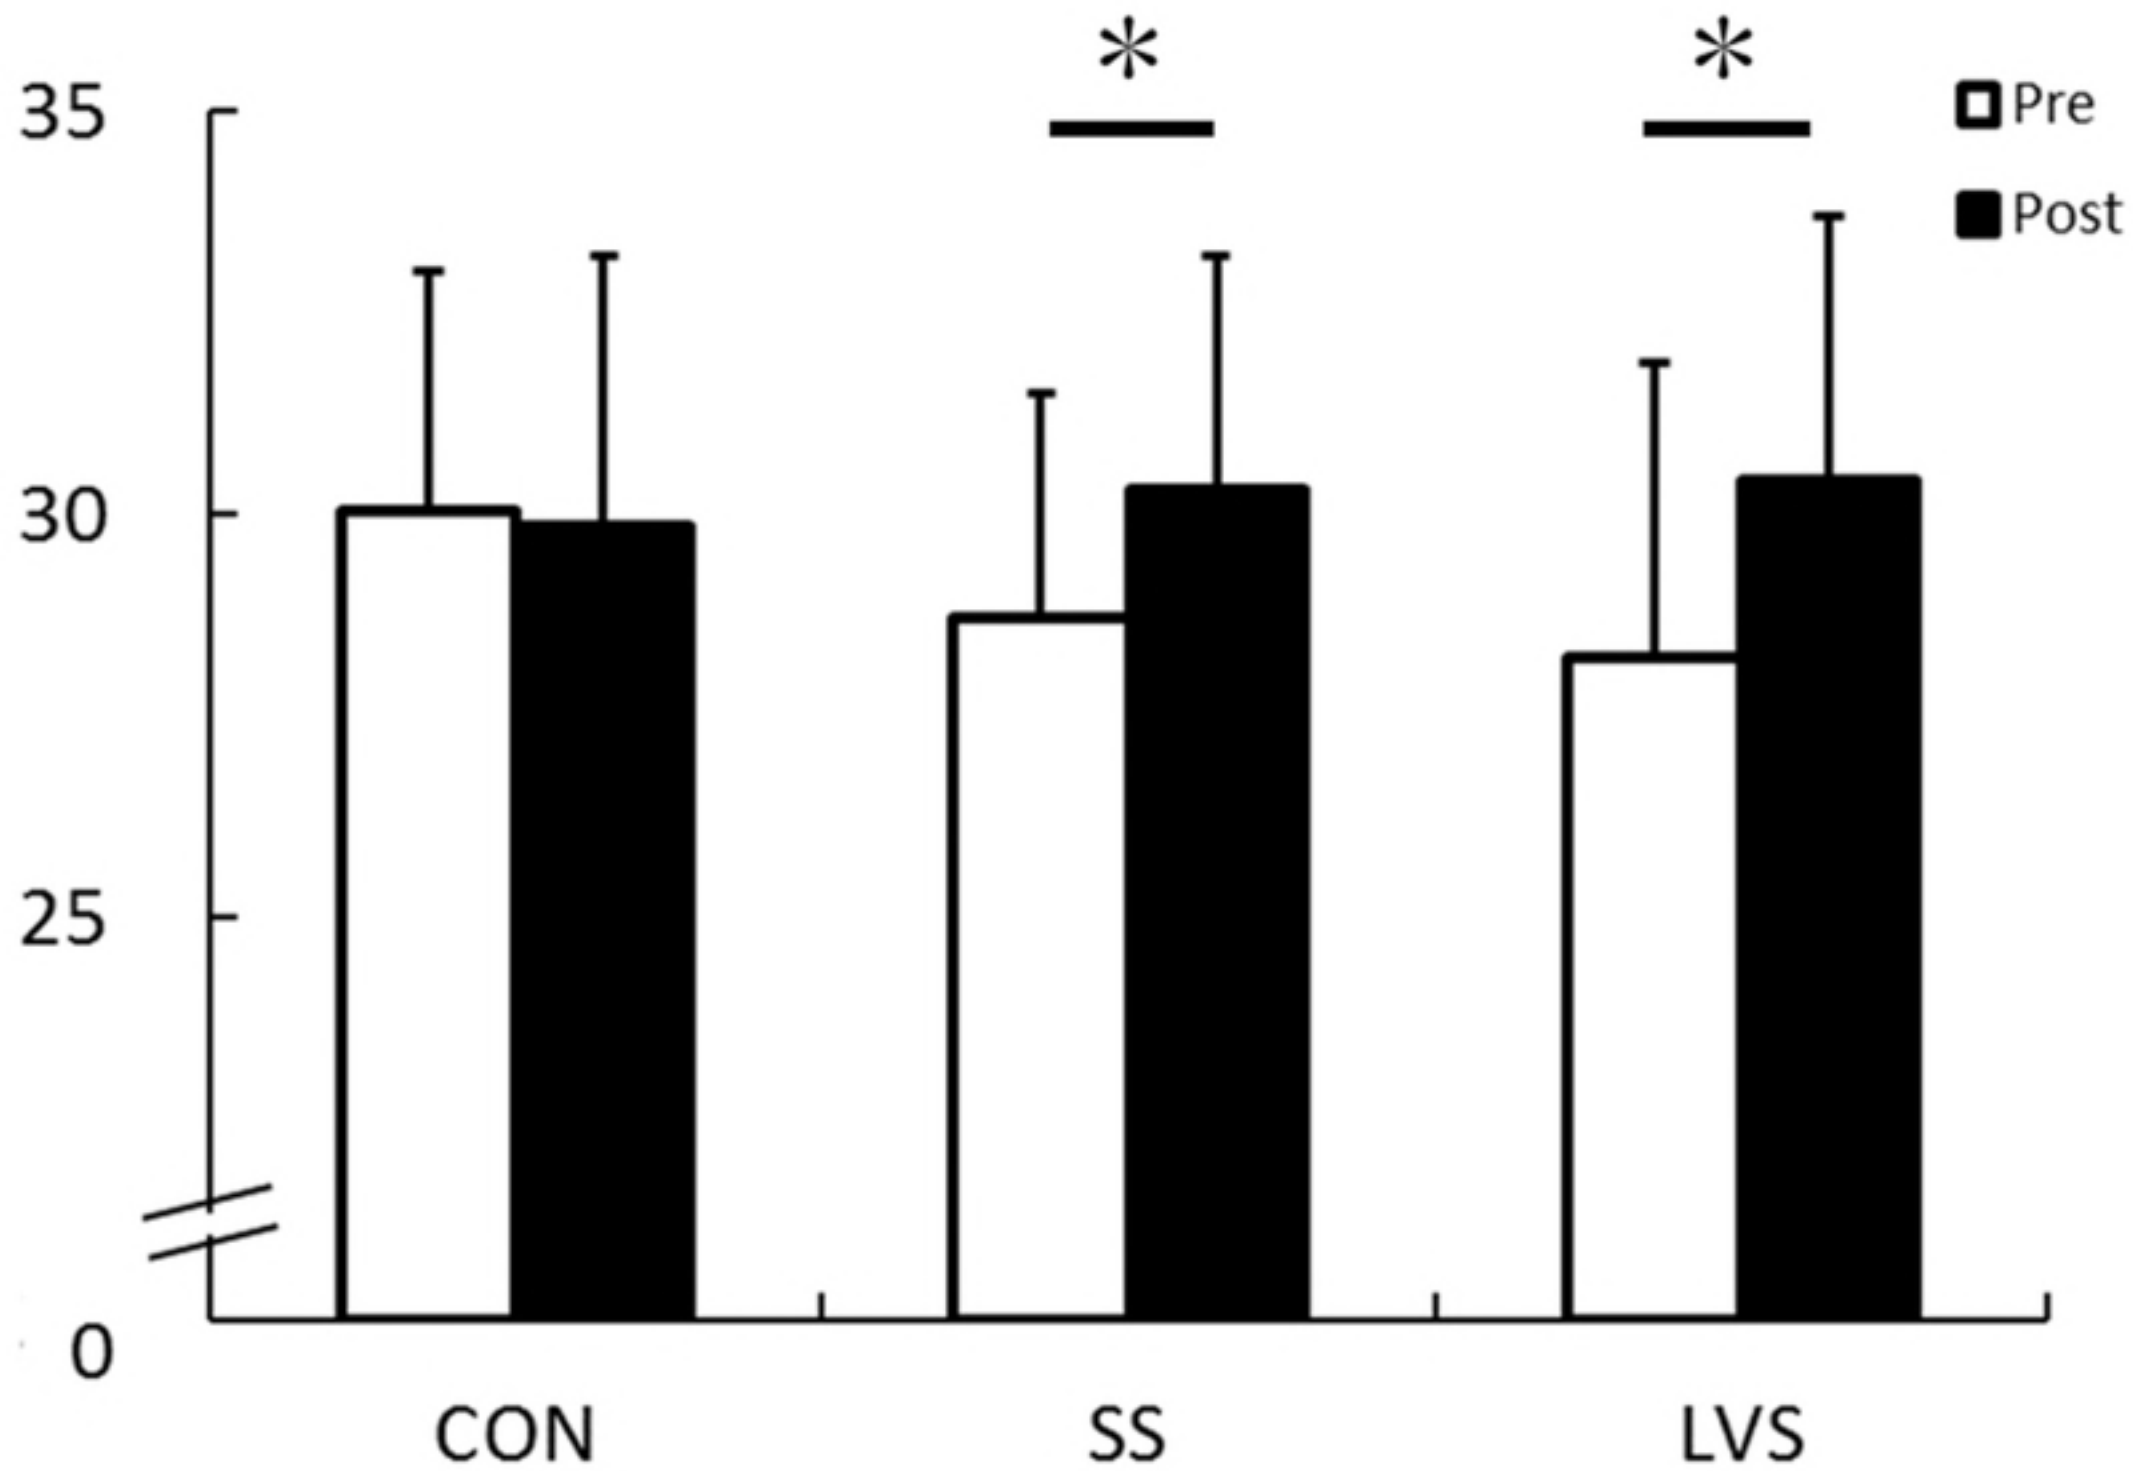



**Tendon elongation (mm)**

20  
15  
10  
5  
0

Pre  
Post

CON

SS

LVS

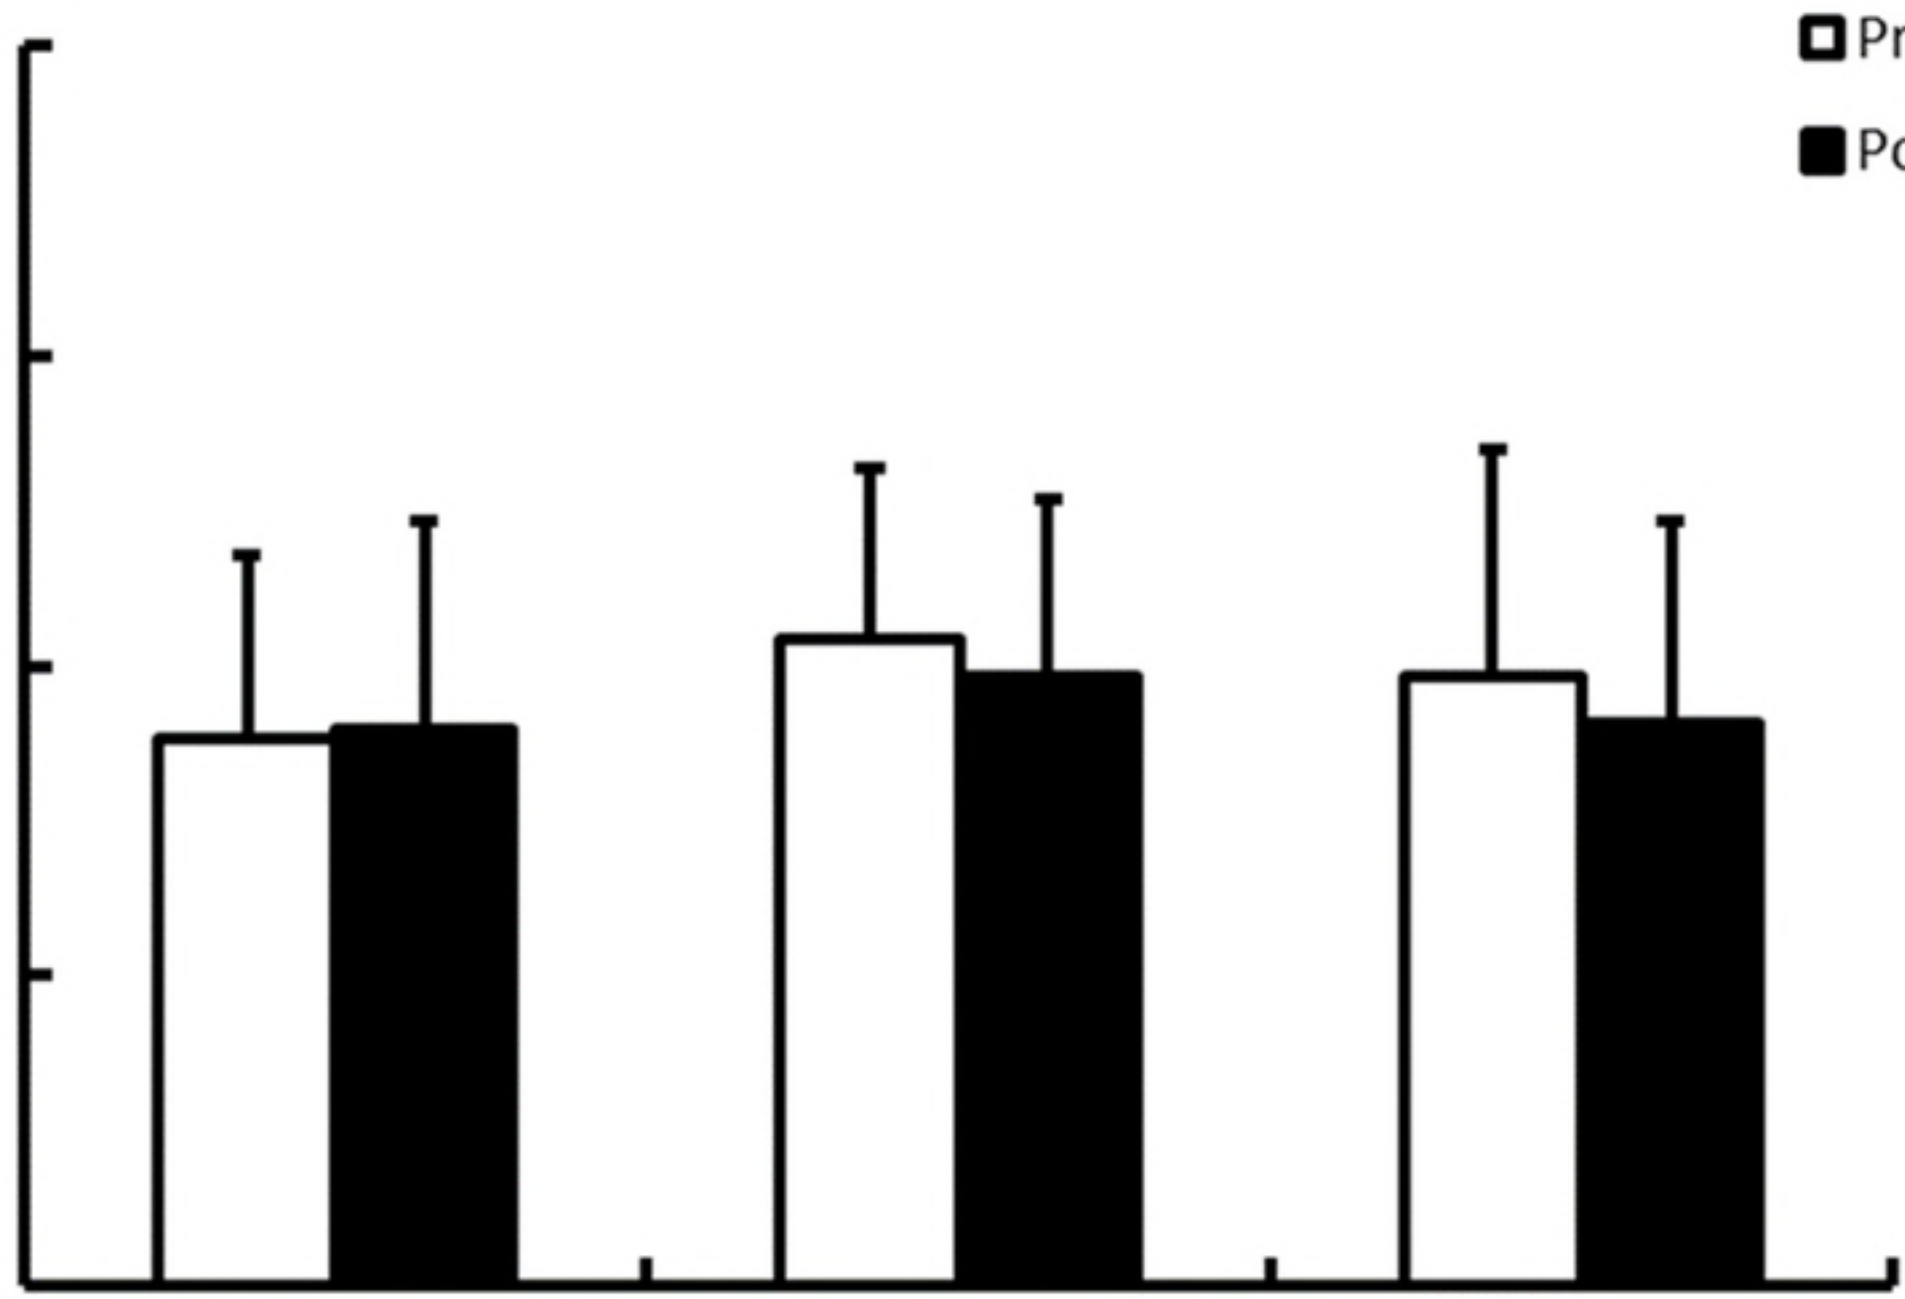

Source: https://www.biorxiv.org/content/10.1101/333864v1.full.pdf
